# Supplementary material for: Learning real-life cognitive abilities in a novel 360°-virtual reality supermarket: a neuropsychological study of healthy participants and patients with epilepsy
Source: PubMed Central journal article supplement (PMC3637817; doi:10.1186/1743-0003-10-42), 2013-04-23
Supplement: 1743-0003-10-42-S1.pdf [file 1743-0003-10-42-S1.pdf]

Additional File 1 Clinical and demographic characteristics of the epilepsy patients subgroup

---

| ID | age | sex    | type of epilepsy  | lesion/ EEG                            | side of lesion       |
|----|-----|--------|-------------------|----------------------------------------|----------------------|
| 1  | 38  | male   | symptomatic focal | temporo-parietal gliosis               | right                |
| 2  | 47  | male   | cryptogenic focal | hippocampal sclerosis (suspected)      | right                |
| 3  | 25  | male   | symptomtic focal  | temporo-parietal posttraumatic         | right                |
| 4  | 35  | male   | cryptogenic focal | temporal epileptiform EEG              | bilateral            |
| 5  | 32  | female | symptomatic focal | occipital periventricular leukomalacia | bilateral left>right |

---
