# Supplementary material for: Learning real-life cognitive abilities in a novel 360°-virtual reality supermarket: a neuropsychological study of healthy participants and patients with epilepsy
Source: PubMed Central journal article supplement (PMC3637817; doi:10.1186/1743-0003-10-42), 2013-04-23

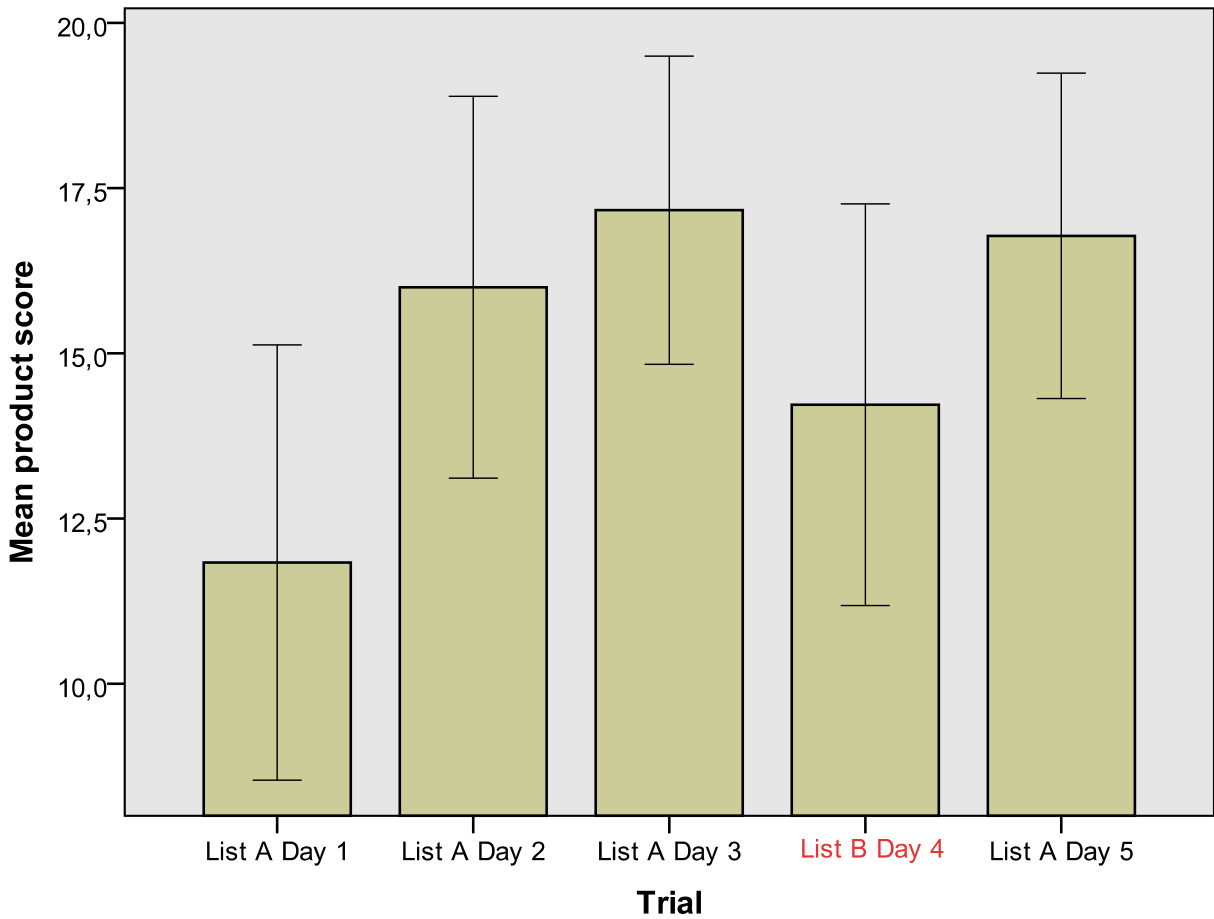

Supplement: 1743-0003-10-42-S3.pdf [file 1743-0003-10-42-S3.pdf]
