# Supplementary material for: Learning real-life cognitive abilities in a novel 360°-virtual reality supermarket: a neuropsychological study of healthy participants and patients with epilepsy
Source: J Neuroeng Rehabil. 2013 Apr 23;10:42. doi: 10.1186/1743-0003-10-42 (PMC3637817; doi:10.1186/1743-0003-10-42)
Supplement: Additional file 2 — Explorative usability questionnaire. The self-constructed questionnaire includes eight items. The first four items comprise the task-score; the last four items comprise the technique-score. Items are translated from the German version used in the study. [file 1743-0003-10-42-S2.pdf]

**Task Score:**

1. All in all, how well do you think you have fulfilled the task?

|       |       |       |         |       |           |
|-------|-------|-------|---------|-------|-----------|
| _____ | _____ | _____ | _____   | _____ | _____     |
| Very  |       |       | Average |       | Very      |
| Easy  |       |       |         |       | Difficult |

2. How important was it to you to execute the task especially well?

|           |       |       |         |       |           |
|-----------|-------|-------|---------|-------|-----------|
| _____     | _____ | _____ | _____   | _____ | _____     |
| Very      |       |       | Average |       | Very      |
| Important |       |       |         |       | Important |

3. All in all, how easy/difficult was the task for you?

|       |       |       |         |       |           |
|-------|-------|-------|---------|-------|-----------|
| _____ | _____ | _____ | _____   | _____ | _____     |
| Very  |       |       | Average |       | Very      |
| Easy  |       |       |         |       | Difficult |

4. How well did you feel during the task?

|       |       |       |         |       |       |
|-------|-------|-------|---------|-------|-------|
| _____ | _____ | _____ | _____   | _____ | _____ |
| Not   |       |       | Average |       | Very  |
| Well  |       |       |         |       | Well  |

**Technique Score:**

1. Did the edges of the monitor disturb you?

|        |       |       |          |       |       |
|--------|-------|-------|----------|-------|-------|
| _____  | _____ | _____ | _____    | _____ | _____ |
| Not    |       |       | Somewhat |       | Very  |
| At All |       |       |          |       | Much  |

2. Did the gaps in between the monitors disturb you?

|        |       |       |          |       |       |
|--------|-------|-------|----------|-------|-------|
| _____  | _____ | _____ | _____    | _____ | _____ |
| Not    |       |       | Somewhat |       | Very  |
| At All |       |       |          |       | Much  |

3. How easy/difficult was it for you to identify the products presented on the screen?

|       |       |       |         |       |           |
|-------|-------|-------|---------|-------|-----------|
| _____ | _____ | _____ | _____   | _____ | _____     |
| Very  |       |       | Average |       | Very      |
| Easy  |       |       |         |       | Difficult |

4. How easy/difficult has it been for you to operate the supermarket?

|       |       |       |         |       |           |
|-------|-------|-------|---------|-------|-----------|
| _____ | _____ | _____ | _____   | _____ | _____     |
| Very  |       |       | Average |       | Very      |
| Easy  |       |       |         |       | Difficult |
